# Supplementary material for: Markedly enhanced up-conversion luminescence by combining IR-808 dye sensitization and core–shell–shell structures
Source: Royal Society of Chemistry journal article supplement (doi:10.1039/c6dt04529d), 2016-12-20
Supplement: c6dt04529d1.pdf [file c6dt04529d1.pdf]

# Markedly enhanced upconversion luminescence by combining IR-808 dye sensitization and core-shell-shell structure

Jiating Xu, Mingdi Sun, Ye Kuang, Huiting Bi, Bin Liu, Dan Yang, Ruichan Lv, Shili Gai\*, Fei He, Piaoping Yang\*

Key Laboratory of Superlight Materials and Surface Technology, Ministry of Education, College of Material Sciences and Chemical Engineering, Harbin Engineering University, Harbin, 150001, P. R. China

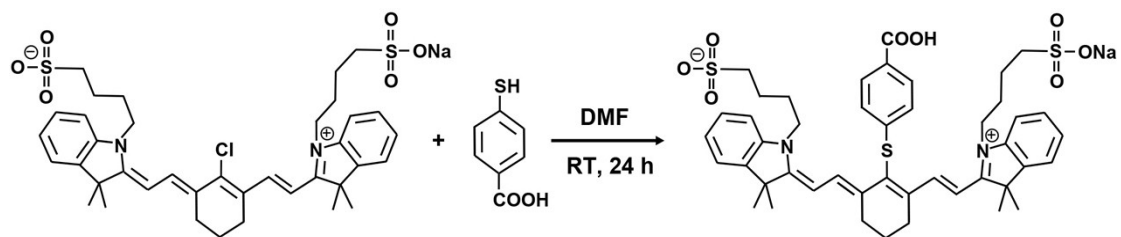

**Scheme S1** Synthesis of IR-808 dye.

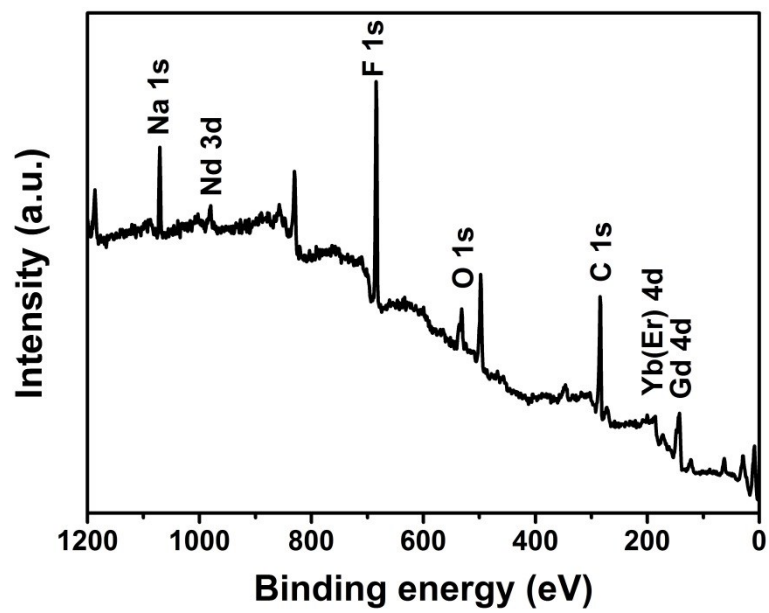

**Fig. S1** XPS spectra of OA-UCNPs.

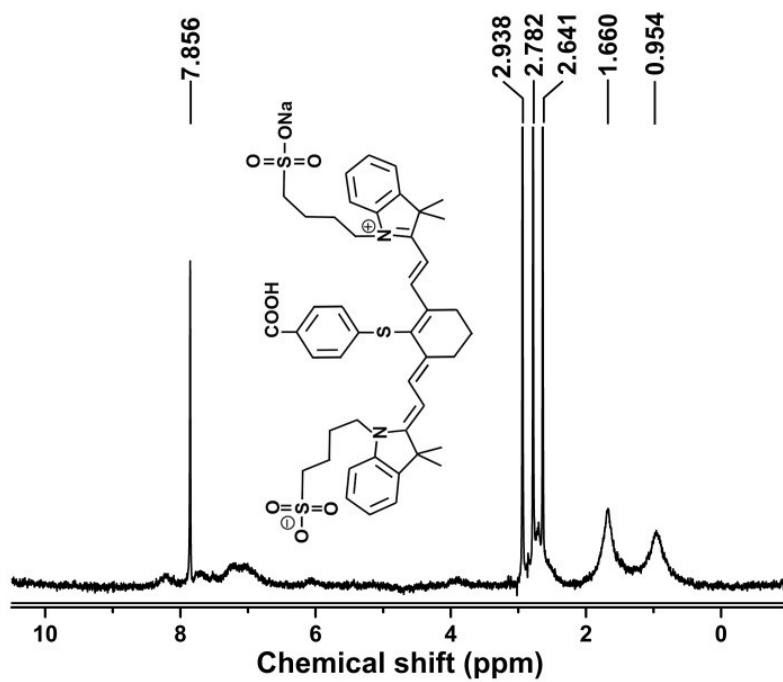

**Fig. S2**  $^1\text{H}$ NMR (500 MHz,  $\text{D}_2\text{O}$ ) spectrum of IR-808 dye (inset is the molecule structure of IR-808 dye).

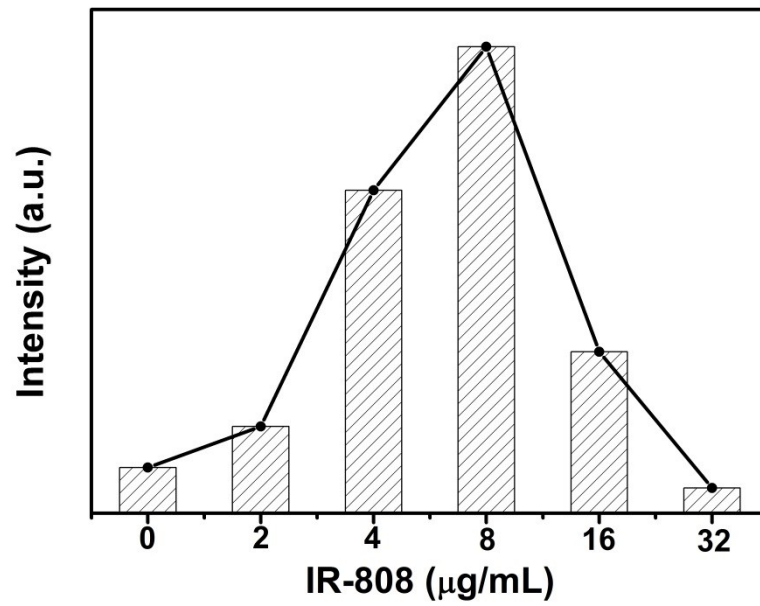

**Fig. S3** Integrated UC emission intensity of UCNPs upon increasing amounts of IR-808 dye.

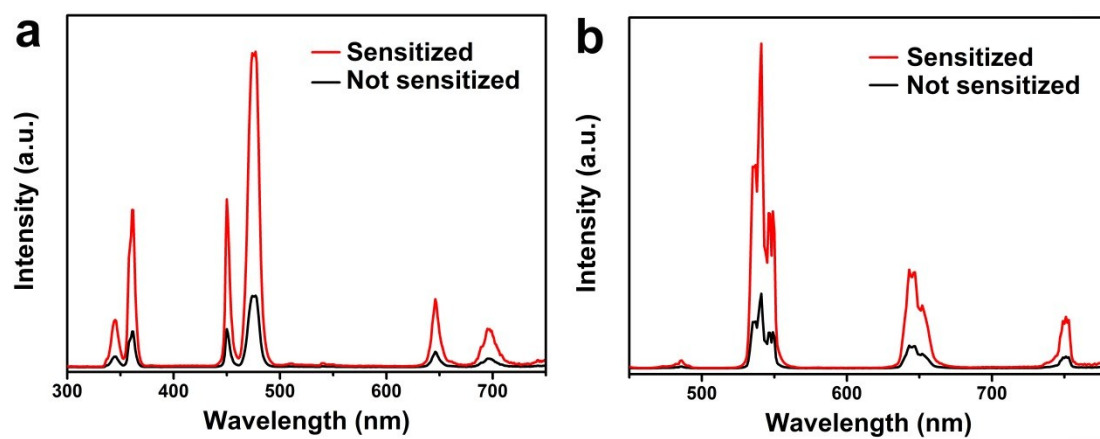

**Fig. S4** UC emission spectra of  $\text{Tm}^{3+}$ -activated (a) and  $\text{Ho}^{3+}$ -activated (b) core-shell-shell structured nanoparticles before and after IR-808-sensitization.
